# Supplementary material for: Gene Structures, Evolution, Classification and Expression Profiles of the Aquaporin Gene Family in Castor Bean (Ricinus communis L.)
Source: PubMed Central journal article supplement (PMC4625025; doi:10.1371/journal.pone.0141022), 2015-10-28

**S1 File. The gene model for *RcXIP2;1* and *RcXIP3;1*.** **A**, The coding region is marked with uppercase letters (the intergenic spacer between *RcXIP2;1* and *RcXIP3;1* is also shown in uppercase letters but labeled with single underlines), under which is its deduced amino acids. The introns are marked with lowercase letters. The start and stop codons are blacked. **B**, Read-mapping graphical representation of *RcXIP2;1*. **C**, Read-mapping graphical representation of *RcXIP3;1*.

**(A)**

```

1 tgaagggcacaatacagtatggtttgcaacttaacgaagatctaataccttgacattggt
61 ggcttcagtgatgctgattggacctttgatccaacgataggaggtctacttctggtttc
121 tgtatcttcttagggagcaaccatgtttcttgaactgcaagaagcaatctactgtatca
181 aggtccagtatagaggctgagtatagaagctgggctaatactagttgctgagttatcttgg
241 ataaactctcttctgtctgaacattaagtttctgttctctgagctcctgttggtggttt
301 gataatcagagtacaatgcttctctcagctaatagccgtgttacatgcaagatcgaagcac
361 attgaactcgatttgatcttcttgaaggaaagtggttaacaaagaaattgatttaaggt
421 atgcctcgtctgttgatcaattggcagatgtgtttactaaggctatttctagttcagctc
481 ttaattcctctagattcaaacttaatgtagaaaatcttctatcctaagtttgaggaggg
541 atgtaagaatggttaatgtgtttgttacgtgtttgttactgagctggtatatagtttat
601 tcgagagggacacgtgtcattataagaatggttcggatgatttttagttggagtatttat
661 gtaataatctcattgtattgttgagtaacacaagattaataataatacaacaagattctc
721 tcatttcacattaagtgctagtaattattcctcaactgccaacctatcctatcattatat
781 taagaccttattttatgatggaaaatagccaaagtgaaccaagaaaatttcataga
841 atcATGGCGGATAATCTAAGGGTTATTGCTGATGAGGAAAATGGCTACGGAGGAAGAAGA
1 M A D N L R V I A D E E N G Y G G R R
901 GTTCAACCTTTTGCTCTACACCACTAGGgcaagtagtctcaaattttctacagtcgtct
20 V Q P F A S T P L G
961 tctcttttagatcttgggttttgttgcataatgaactgagtatacttggttctgattttg
1021 cagGGCAGCTCTGGACAATACTAACGGTGGAAAAGAAGCAAATCCTACTACATTCAGTAG
30 A A L D N T N G G K K Q N P T T F S R
1081 GGTTTTGGGCTTGAAGAGCTTCTTCTTTAAATgtagtaataatactctcttacgagcag
49 V L G L E E L S S L N
1141 tttacgtagttatagctaccgacaggggtcaagcctgaaaactattttcttttagcaaaatg
1201 acaatatcttgcccaaaatgagtaaaattaacatagaaagtaagcactaactgtggcctt
1261 gactagctagtagcttctgtcttctcttcccaccactaactactaataatgtatgtcgatta
1321 ttgaatttggcaacgccacctttagtacaattgaattacatgtaattgatgggcggatta
1381 caattttattactatcatcagGTATGGAGAGCATCTGTGGCCGAGGTCTAGGCACAGCA
60 V W R A S V A E V L G T A
1441 GCCCTGTCTTTGCTACAGACTATAGTCATCTCCACCTACGAGACCGAAAACAAAAACA
73 A L V F A T D T I V I S T Y E T E T K T
1501 CCAAACCTTATAATGGCAGCTTAAATCGCCATGACAGTCACAATTCTTCTACTGCCACA
93 P N L I M A A L I A M T V T I L L T A T
1561 TTTCCCATCTCTGGTGGCCATATCAACCCTGTCATCACCATTTCTGCTGCATTACAGGC

```

113 F P I S G G H I N P V I T I S A A F T G  
1621 CTTGTTTCTCCTGTACGGGCTGCTGTATACATCTTGGCCCAATGTCTAGGAGCCACACTA  
133 L V S P V R A A V Y I L A Q C L G A T L  
1681 GGCGCACTAGCACTAAAAGCTGTGGTAAACAGCAGAATAGAGGAAACATTTTCTCTGGA  
153 G A L A L K A V V N S R I E E T F S L G  
1741 GGTGCACTCTAACATTGTTGCACCAGGCCACAAGGACCCATCGTGATCGGCCTTGAG  
173 G C T L N I V A P G P Q G P I V I G L E  
1801 ACGAGTCAAGCTCTCTGGCTGGAGATAATCTGTACATTTTGTTCCTATTTTCTCAATC  
193 T S Q A L W L E I I C T F L F L F S S I  
1861 TGGCTGGCATTGACAAGCGTCAGGCCAAACTTTTAGGTCAAGTCATCGTTGACAGTATA  
213 W L A F D K R Q A K L L G Q V I V C S I  
1921 ATTGGGCTGGTAGTGGGCTGATTGTGTTTCATATCGACGACGGTGACAGCCACGAAAGGA  
233 I G L V V G L I V F I S T T V T A T K G  
1981 TACGCAGGGGTCGGGATGAACCCGGCTAGGTGTCTAGGCCAGCTCTGTTAGAGGTGGC  
253 Y A G V G M N P A R C L G P A L V R G G  
2041 CACCTATGGAATGGGCATTGGGTATTTGGGCTGGGCCTGTGATTTCTGTGTAGCTTTT  
273 H L W N G H W V F W A G P V I S C V A F  
2101 GCTATTTACACTAAGATAATCCAAAAGCTGAGGTCCATGCATAAagggtgataactgatt  
293 A I Y T K I I P K A E V H A \*  
2161 tacatccatatttgaatgtggcatttaaaatggctcacaagtaagaatgcatctttat  
2221 gctgcttttttatgtttccagttagaggcttttactgttggggcatttgcactgacca  
2281 aacttattaatgtctgttaactttaaattgtgtttttgtgatcctggcacaatgatgct  
2341 aaaaatgtaatatatctcagtttattatcaggacttctggcttttcttttgttatattgtc  
2401 aatttatatagcagcatatatgtcatttctccttgatgataactagatttaataaagcaa  
2461 aAAACAGTGCTAGTCCTTACGTTGGAGTCTTAGTTGCTAAATATAGTATGAATTATATAT  
2521 ATATATATATATATGATTGACCAACGAAATAATATCATGTAATGTTTATTTATTAGTTG  
2581 GTATAAAGAATTGTGAAAAGAAAAGTTAATTTTCATGATTTCAAATAACTTTTAAAAA  
2641 AAATTAGGAAAGAGAATTACAATTGACGAGATTAATAATAATATCTGCTCTTAAATAGT  
2701 ATTATAATTCAGAGCTGAACCAAGTTATCATATTATGTCAAATTTCAATCCAAAATCAAT  
2761 TGATATTGATACTATGTTTGGTTAAAATTCACTAAGAACTTCATTTTATTTTAAAAATA  
2821 TAAGAGATAATATAAAATGAAAATAATAAGATATTTTAAATGTATGAAATATATTAATTT  
2881 AAAAAATTTAGTTATAACTAATTTTACATAAAATTTAATTATATAAAATTTTAAATAATTTT  
2941 CACTTTATTTAAACCATTTAAATCTTAAATGCANNNNNNATTGATCTATAATTAACAAAT  
3001 TATATTCTACAGCTAAATCTCCACGTAAGAAATGGGAGCTGATCCATGAATCTATGATTA  
3061 AAAATAATAATAATTTTATTTTGTACACAATATAAAATTAATTTATAAATAAAAAAT  
3121 TAATAAATTTTAAATATTTAATATTTATTTATGATTTTAAAAATTAATAGTAAATTA  
3181 ATAGTTTAGATGTCATTTTTAATTTTTAATTTTTAAAAATTTTATTTATGCATTAATAT  
3241 AATAATATTTTAAAAACACTTATTAATTAATTTAATATTAATAAATAAATTTCTATCA  
3301 ACATAATTGATATAACTCTTTTAAAGATTACAAATTATTATATAACTAAAAATTAATTTA  
3361 CTAATAATATAATATCTAAAACATAATTTAAATATTATTTTTTTTAAATTAGGATTATT  
3421 ATCTAATTAATAATAATTTAATAATATTATAATATAGTTAATATGTTAATTTTACA  
3481 ATAGAATTAATAATTTATCTAATAAGAAAAATTAAGTTATTATTTAATAATAATTAATAA  
3541 TATAATTAACCTGTTATTTTGAATTAGAATCACTATTTAATTAGAGATGTGACTTATG  
3601 AGTCAATAAATAGAAAAAGAAATATTAATTTATACATAAATTTGAATTCATATGTCAGA

3661 AATAAGTACACATGTCAAAAAATAATTTAATATATATATATATATATATATAAATTA  
3721 ACTTATTTATTTATTTGTTAGGGTATTCTCAAACCAAGACGGAATTGATGAATGATTCAA  
3781 CTCAAGATATTTATCAAAACAATAGAGGAACATATCCAAGATTTGATATCTTTGGAGTCAC  
3841 AACCTTATCTTCATCACTGCTCTCACTTCAAAAATCATAAGTAATATAAGTTTTATTATA  
3901 GGAATATTGATGTTAGCAGCTATGATAGTTAGCCCCTATGTTAAACTCATTTTATAATC  
3961 TTTGCATTTTGCTTTCTAATTTATATCTTAAAGTAAACAACAATGCAAAAAACAACCCATGT  
4021 CCTGAAATCTTCTTAGCTGTACGTAAGATATTTGTCTAGTCGTTATCTACAAAAGAATGA  
4081 ACGAACCTCTTTTAGTATATTTGATGGATATACTTCATATTCTCACCTTGCAATTTGTC  
4141 CTTTAGACCAAACCATTTTTATTACAAAACCTAAGAATGTTAATGTAGTTTTGCATTTGG  
4201 AGTTTTGGAATCTTCGTAATGAAATTGACCGATCGGCAAAATCCTTATATATTGATGAA  
4261 TAATTATCTCCTATATGCTAAGAGAAAAGGACTAATTACTTATTCTCGCAAATATATAGA  
4321 ATTTAAGGCATGGATTTGAATGTAGTCTCACAAGATGCTTGTCAATCACCATTCTCA  
4381 AAGTCACTGAAAATGGCCACACAATCAGTAACTTCACAGCCACAAAAGAATCTTTGAAA  
4441 ACAGGCTTTCTTGATCATATTTGGTCTCATGAATCTTTTCAACAGAGGTAATTAATGTG  
4501 AATTGATATTATTTATCTTTGAAATCCATCTTTGAATGATTTTATTTATCTTCCAGAT  
4561 GTGGAGAGCAACATTCAGTGTGCTAGCAACATCTTGCCTCTTATTCACACTGACCAT  
4621 ATCTATCATCTCAAGCTTAGAATCACATGAATCAGAACCAAGATTCTAGTCCCATTGGC  
4681 AGTCTTTATAATTGCCTTCTTCTCTCTTAAACAACCGTTCCTTTATCTGGAGGTCATAT  
4741 GAATCCAATTTTACCACCATTGCTGCCCTGAAGGTGTATAACTTTCCTTCGCGCCAT  
4801 ATTCTATATCCTGGCACAATGTGTAGGCTCAATCCTATCTTATATGATAATCAAGAGGGT  
4861 GATGAACAAAATGTAGCTAAAAAGTATGCTTTAGGTGGCTGCATGATCAATGATGAAAA  
4921 TGGAGAAGGGGTAACCTAGCAACAGCATTAGTGCTTGAGTTTTCTTGCACTTTTTTGGT  
4981 CCTATTGTGGTGTAACAGTAGCATTGACAAGAGAAGGTTAAAGAGCTTGGATTAGT  
5041 AATGGTATGTGCAGTATTGGCAGGAACCATGGGATTAGCTGTTTTTGTTC AATTACTGT  
5101 AACTGGAAAGAGTGGCTATGGTGGTGTGGGCTTGAATCCTGCAAGATGTTTAGGGTCAGC  
5161 TTTATTGCATGGAGGTGCATTGTGGTATGGGCATTGGGTTTTCTGGGTGGACCATTTTT  
5221 GGCTTGCAATTGCTTATTACTGTATACTTTGACCTTACCAAAGGAAGGCATGGGAAATAT  
5281 AGATGCTGTAGATTGATAAATCATAAAGTACTTTAAATTTAGTGTTTTTCTTCTTTGTA  
5341 TTGAATGAAAATTTTATTCTTTTATTAGAACTAGAGGTATACCTATCCTATGGGCGGAA  
5401 TATCATTTTATTTATATAATAAATAAAAAATAAATATATTAGACATTAATTAATAATTA  
5461 AAAGATGAAATATGGTATAAAATTTTTTATTTTAAATGAGAAAATAATATAATTTTT  
5521 TTTTGCATAATCATTTTAAAGCGCCGAATAAATATAAATGTCAACTAATTTAATCAAAG  
5581 GAGGAAACAATTATAAATGAGTAGATAAATATGATTTGGAATACTAAAATTATAATAAA  
5641 ATACGATTAGTATGTATTAATTAATAAATAAATTAAGTGTATAAATAAATAGATATAAT  
5701 ATAATTTGACTACTGAAACTACAATAGAGTATGATTACTAAGTGTTAATTTAATAAATTA  
5761 AACTGTAAAGAGTAATCCTTATTATTTTACAGAATTTATATCAACACTTAGTCACTCTCA  
5821 CTTTAAATAGTTACTCGCAATTATTGATAATAGAAATCAAAAATAATTTTATGAAAAA  
5881 AATATGATAAGAACAACATATAAATTTTTCTTCATATTTTAAATCTTTTGCATAATAT  
5941 GCATTGTCAAATTTGTAATGAAGTAAATGAATTATAGTGTGGGGAAGAAAATTA AAC  
6001 ATCAATATACAAAAGATATTTAATAAATCTTAAATTC AAGTACATTTCTATCTATTGCC  
6061 TTAACATTGTCCCAAATACAAAATAATGCTTCTTCATATGAAAATCTTACAAAAAAA  
6121 AAACCTTGTTAGCATTTGTTTCGAGCAAAATCATTATATATATATGAATACGAATGAA  
6181 ATGAAATTTATCTTCTCAGCCAATTCAATCTTAAATATGATTAGCATATAATGAATATC  
6241 CAATATATAATATAATGTTAATTTCTCAAGACTTCTAATTATAATAATCTACTCCCATTA

6301 AATATTTTCTATATGATGAATTTTATAGTTTATAAAGAAAAACAAAAGGAAATAAATTGT  
6361 TACGAGTAAATTTTATGAATATTACATTAATTCATAATAGGATACATGTGAATAAAAT  
6421 ATCAACATGAAATAAATAAATTATAATATATGAATTATGCTTGGCTAGAAGCAATAACAA  
6481 CAAAGAAGTTGTAACCTTTTTGACCATAAGCTTATTTTGATAACACAATCCTTACCAATA  
6541 ATACATACTATTTGTAACATCAGCATTAAAGCATCTTAGATGGAGACAAAATAGTGAATTG  
6601 ATTATAAATTGGAGATGAATAGTTTAGAAGCTGCGAAAGAGAGTTCAAAATTCTCAATTA  
6661 TATATATATGTTGCAAATCACATATTATTGAAAGATCTAACTCTATAATTTTTTTTTT  
6721 CAACAAATTCAATGTTGCATCATTCTTTATCATTATTGAGCAAACCAAAGGCAATCACAT  
6781 GTTTTTATCATTGTTAAAGTAACAACAAGCATATTTGTATTTATTTTCTATGTGTCAA  
6841 TAAACCTTTCATAATCTATATGGTACAAATGAATTTTGATATATTATAGAATTAATGCT  
6901 AATTGGGAAAAAGAAAAAATTAGATGTATTTAATTTATAGGTTATAAATTTTTTCAATT  
6961 TATTGATTATGCTTTTATAGAAATACTTATTGTTTATTCTTACGTCAACCCAGTTT  
7021 TCTTTTTAAAAAAGTTAAAAATTCTAAAAATAATCTCATTTCATCATTATTAAGCATT  
7081 TAAAAGCTATATTGAATTGAAATAGACTATTAACCTTTTTATTATTAATAAATTGAGGTT  
7141 ATATATATAAAAAATTTGTAACCTACCAATTTGATTTAAATAATTGAATATTTAATTGAAA  
7201 AATAAATTATAACTAATGATGTTAATTTATTTATTTAAATATCTTTTATAATAAGATAG  
7261 CTTATCAAGATGAAAAGAAAATTTCAAATCCATAAAAAACATTAAGAGAAAAAAGAG  
7321 TATTAAGAAGACAAAAAGAAAAAGCTAAAATTAAGAGAAAAATAGTTAAAAAATAAT  
7381 AGAATGCCATCTAAAAGAATTTATATAAAAAATAAATTTTCATGTATATAGATTTAACTT  
7441 TTTCTAGATCGGTAATGAAAAGCAAGAAGCCAAGTTGACTTACTAACATTGAGGGATAA  
7501 TTGCCATTAATGAATACTTAATATTGTTTCTGATGATTTAGATGAAAACGAGTTAAATAA  
7561 GCTTCAACATAATTTATAATTGCCATTAATGAATTATATAATTATCATATGTATATTTA  
7621 TTTGGTGATGACTTGATTTTCACTTTATTCTACCGTCCATACCATGTGAGACCCTACTT  
7681 CAATGTCTATAATGGTTATTGAGAAAGAATTTGTTTTGTAAAAACAAAACAAAAAT  
7741 TATCATAGAATTCCTGCTTTTTAGGAGTTCTTAGGGCAGAAAACGACCTCTCCCATGAAA  
7801 GATTGTTTTATAAGGATTGTTGAGTTTGCATGTGCAATCTCACATGCATTTATTATATT  
7861 TTATTAAGAACATATATTTACTGTCCTACTGGCATCGATGGCTTTTCTTTGCTGTGCG  
7921 ATAATAGCTATATTTGATTTTTACTTTCTGTTTTTTTTTTTTTTGTAATTTTTTTAGTC  
7981 ATAATAAAGTAACCAAATTATTTCTATTTATTTATACAGTTGGTCAGAATTTATAA  
8041 ATGTTGATTATAAATATTTTACTAATGAATTTTACAAAATAGATGATAATGAAAGAAGA  
8101 TCCTATGGCTATTAAGTTTAAATATTCCGAGATAAATCAAATTTATCATTAAATAATA  
8161 TGAATTTATTTAGTTGAAGTTTGTTTAAGATTTTATTTTATATTTATTTTAAATTATT  
8221 TATTAATTTTATTGATTAATATTTATAGATATTTTGTTTAGTTTATTTTTTACGGAGGTT  
8281 TGTCTTTTTATAGAATTTTTTTTATGAGAGTTATAATGAGTTTAAATTATAATTTAA  
8341 AATGATAATGAAATCGATCTGTGGCTTAATATAGCACCAAGTGGCATATATTTCATATCA  
8401 ATATGCCAAATGCAGCCAATATACTGTATATAATTATTATGTCAATACGATAAATGAATA  
8461 TTAGAAAAAATTCATTTTTATCAAGATTAATATTTATTTTTGAAATGAAATTTACT  
8521 TATATTTATTAATCATTTTTAATGAAATATCTTTTTATTTTTTTTTTAAACGAGATACTC  
8581 ATATATAATACCTACAAAACATTATCCAATTGAAGGATCCCTGCTATTGCTTTAACAACA  
8641 ATTCTTGGGTACACTATGTCTGGCAAATGAGGTGTTATGGGATCAAAGTGCACCCTGA  
8701 CAGGAAAAATGAAAAGCATTAAAAATGATGATATCCCTTATTTATGATCCATAAACAA  
8761 AGGGATATGGTATCTCAGCTGATATATTGCAATTTCTTTTTCATGTGAACCTGTGCACG  
8821 AACGCAAGACAAAATTGAAAGATATTATGAACTTGGTCTAGATATTTATCATGGCCAAT  
8881 TTTTAAAACTAAGTGAATAATAGTGTCAATAATGGCTAGAATTAATAAGCATGTCTA

8941 TACTGTGAGGATTGACCTAGATTTCTTTCTATATAAAGATATTGGAAAAATCAGGAAATAA  
9001 TTTTTTTTTTATTATTCCAGAAAAATTATAATTTAAATGGTATTTTTAAAATAGTATTT  
9061 TGCCACACATAAAAGTCCTATATGACACTATGTATATTACTCTAAATTAATAGATTAATAA  
9121 AATTATTATTATTATTGGTGAGGATGGTAACTTTCTCTATTTCTGAGCAATTATAAGGA  
9181 CACACCAAATATTAACATGCCAGATGAGAATCTTTATCCATGAAATATTAATAAACAG  
9241 CCTAAGTTTAAATTTAGAGGAAAAAAGAAAAATATTATTTTATTTTATAAGAATAT  
9301 AAATATCCATAAATAAGAATTAATAAATACATTTTAAATATAAAAAATAAAAAATAACATT  
9361 AAACATCAAGAAATATACGTAAGAAATTTATTCTTAACAATCATCAATCGTTTAAATAG  
9421 AGCAATAGATTGTAATTCTGCAGATAGAGCACTCCATCCGATAACATTAAGTCATATATC  
9481 GACTTATAGAGGTTTTTGGACTAGTTCAATTATTTGAATATTGAATTAATTTCTTTTTT  
9541 CTCTCACCACCTCGTACAGATAGAACTCAATACCTTCATGGTGGATTATAAATCTTTTAT  
9601 AAAATGAGAAGTGAACACTCTTATAATGAAAGATAATAAAATTTATAAAAAATATTAATA  
9661 TTTATTTATTAATAAATTAANNNNNNNNNNNNNNNNNNNNNNNNNNNNNNNNNNNNNNNNNN  
9721 NNNNNNNNNNNNNNNNNNNNNNNNNNNNNNNNNNNNNNNNNNNNNNNNNNNNNNNNNNNNN  
9781 NNNNNNNNNNNNNNNNNNNNNNNNNNNNNNNNNNNNNNNNNNNNNNNNNNNNNNNNNNNNN  
9841 ATATAAATTATATATATATAACGTCACAAATGATTTCTTTGAATCTTATATAAAGTGGGAA  
9901 TAGCTGTTTCAATAAATGATCTAGAAGGTGATAATGGTTCTTGAATATAATATATATA  
9961 TCACTAACCAATATTATAGTTGAAGAATCATTAATGAATATTGTTATAAGTTATCAGTT  
10021 GTAATAGTCCAATTCTTTGACTGGAATAGCACTGCATAAATGTGTCTATAAATGTGGCCA  
10081 AAAAGTTAGCCATGAAAAGCAAAGGCATTtagag**ATGGCTGCTTATGGAGTTGTTCAAGAT**  
308 M A A Y G V V Q D  
10141 GAAGAAAGCCTTAGTGGCAATAAGATACAACCGGTAGCCTCTACGCCAATgcaagtgttg  
317 E E S L S G N K I Q P V A S T P M  
10201 ttactttgtatctaatgtttttttttaataagaagaagtatataaactcaatttgttgc  
10261 tcttttctgtttctcgttattaattgatcatatatgtattgattttcagGTCTGAGCAAC  
334 S E Q Q  
10321 AAAGCACCAGGTAGGGAAGAAGCAAATCTCCCCACATTGAGAAACATATTAGGCTTTG  
338 S T R V G K K Q I S P T L R N I L G F E  
10381 AAGAGCTTTTCTCTTTGACGgtaagtatgactttgtatagagtagaatctgcaaccccat  
358 E L F S L T  
10441 aaaattatcatttttttttaattgcaaatgaaaaggaactcaaatgtgaatcaaggt  
10501 taagttgagatatatacatataatctatagaactatcatttcttagtagaactatataaa  
10561 taataacatattttacatattaatgtatatagatacgaagatgaatacaatataattgtag  
10621 ttcaacttttacttttaatttataagaatgtgcaaatcacttacttaaattgaaatata  
10681 tacctacaactagttgaaatactagatatgttataaggttgacttaaagtaataataaa  
10741 tttcgactagtgcttttagggatctctattgtttccatataaattttaattgttttct  
10801 ctcaccttgataatttcttaaaagatgaccttttgccaaatgcaaatgatattaatcat  
10861 taagagactagtttagaagtttaaggtatttaatttaaggaggacacacacatctaattg  
10921 aacaattgggaccaaattaaactacatgtcaaaaagcaacttctgattaattttcgtcat  
10981 cagagtatatccgaaaaatgagtgttgacataactcttcattattgatagtagttagtca  
11041 caatatccttttagatacatattacattaatgatttctttcttaattgtgagactcaaatat  
11101 tacaatccatcacataataaacatggaaaagcaattcaattatttattactagctaacaa  
11161 cttttccatacaaaatgatatttcttttcagGTATGGAGAGCATCTTTGGCAGAACTC  
364 V W R A S L A E L

11221 TTAGGCACTGCAATTCTTGTATTTGCAATAGACACTATAGTCATTTCCACTATAGAGAGC  
 373 L G T A I L V F A I D T I V I S T I E S  
 11281 GAAACAAAAGTACCAAACCTTATACTATCATGCCTTGTGGCCATCATAATAACAATTCTC  
 393 E T K V P N L I L S C L V A I I I T I L  
 11341 CTTATTGCTACATATCCAATATCTGGTGGTCACATTAATCCTATTGTTACCTTTTCTGCT  
 413 L I A T Y P I S G G H I N P I V T F S A  
 11401 GCACTACTGGCCTTATTTCCATATCAAAAGCCTTCATATACATTTTGGCTCAATGTATT  
 433 A L T G L I S I S K A F I Y I L A Q C I  
 11461 GGTGGGATTGTGGGTGCACTAGCACTAAAAGCAGTAGTCAACAGCAACATTGAGAGAGTA  
 453 G G I V G A L A L K A V V N S N I E R V  
 11521 TTTTCACTAGGAGGTTGCACTCTACTATTGTTGCACCAAGTGCTCATGGTCTGTACT  
 473 F S L G G C T L T I V A P S A H G P V T  
 11581 ATCGGTCTTCAAGTTGGCCAAGCCCTTTGGTTAGAGATTATCTGTGGGTTTGTTTTCTT  
 493 I G L Q V G Q A L W L E I I C G F V F L  
 11641 TTTGCTCAGTTTGATGGCGTTTGATGACCGTCAAGCAAAGGCCCTGGGAAGAGTTGTG  
 513 F A S V W M A F D D R Q A K A L G R V V  
 11701 GTTTCATTATTGTTGGGGTTGCTTAGGCCCTTCTTGTGTATGTCTCGACTTCGGTTACA  
 533 V F I I V G V V L G L L V Y V S T S V T  
 11761 ACTGCTAAAGGCTATGCTGGAGCTGGGATAAATCCTGCAAGGTGCTTTGGGCCAGCAATT  
 553 T A K G Y A G A G I N P A R C F G P A I  
 11821 GTCCGAGGTGATCATCTTTGGAATGGGCATTGGGTGTTTTGGGTGGGGCCATTTATTGCT  
 573 V R G D H L W N G H W V F W V G P F I A  
 11881 TGTGTGGCATTACTTTGTACACTAAAATTATTCCTCCTCAACTACTCACACAATGTAG  
 593 C V A F T L Y T K I I P P Q L T H T M \*

(B)

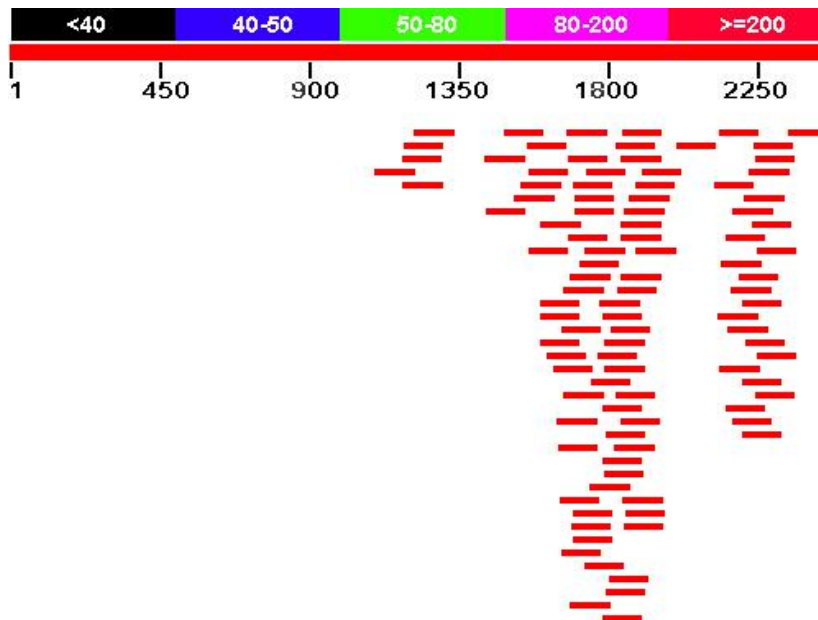

(C)

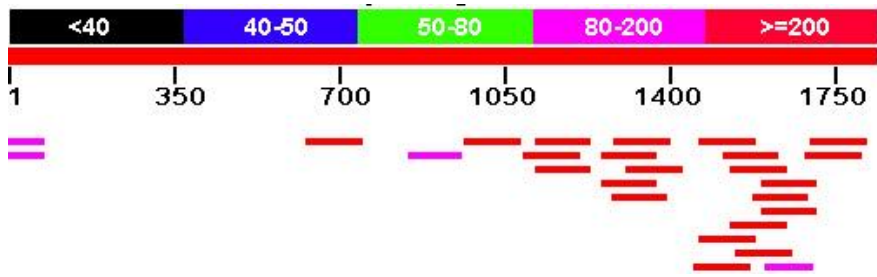

Supplement: pone.0141022.s001.pdf [file pone.0141022.s001.pdf]
