# Supplementary material for: Gene Structures, Evolution, Classification and Expression Profiles of the Aquaporin Gene Family in Castor Bean (Ricinus communis L.)
Source: PubMed Central journal article supplement (PMC4625025; doi:10.1371/journal.pone.0141022), 2015-10-28
Supplement: pone.0141022.s003.pdf [file pone.0141022.s003.pdf]

**S3 File. The gene model for *RcTIP2;2*.** The coding region is marked with uppercase letters, under which is its deduced amino acids. The transcribed untranslated regions, including 5' UTR, intron and 3' UTR sequences, are marked with lowercase letters. The start and stop codons are blacked. The primers used for PCR amplification are labeled with single underlines.

```

1 gaagcactatgcttaagctgctgctgtatataatattctccaaaatacat
61 gcttaacatatcatatacaggttttaagtgtcccgctgtagctaattgccaaggtg
121 ctagctagcaaaaacagaaggaataaaaATGGTGAAGATAGCTTTTGGTAGTTTAGGAG
1 M V K I A F G S L G D
181 ACTCTTTCAGCGCTGGATCCCTCAAGGCCTATCTATCTGAGTTCATTGCCACTCTCTTT
12 S F S A G S L K A Y L S E F I A T L L F
241 TTGTGTTTGGTGGTGGCTCTGCTATTGCTTACgtaagtgattcaggaatccctttc
32 V F A G V G S A I A Y S
301 ttttgtttttcaggttcctgatataatattgtatttgatcgtacaagaatattgca
361 tgcattgctaccttagaaaataacaataatataatattttcttttcgtgtggaatattatag
421 GCAAGCTTACGACAGATGCAGCTCTAGACCCACCAGGGTTGGTTGCTGTGCCAGTGGCTC
44 K L T T D A A L D P P G L V A V A V A H
481 ATGCTTTCGGACTGTTTGTGGGGTAGCCATCGCAGCCAACATCTCAGGTGGTCACTTAA
64 A F G L F V G V A I A A N I S G G H L N
541 ATCCAGCTGTCACCTTTGGTTTGGCAGTCGGAGGGAACATCACCATCCTAACTGGTATCT
84 P A V T F G L A V G G N I T I L T G I F
601 TCTACTGGATTGCCAGTGCCTTGGCTCTATTGTTGCCTGCTTCTTCTCCAATTTGCA
104 Y W I A Q C L G S I V A C L L L Q F V T
661 CCAATGGCAAGgtatttgatacaacctatataatagcctatacataagtgatacatata
124 N G K
721 tttaataacattaaaacattaaggtttatatcaattattggacgttcaagtattataagc
781 aaaattagataataaagtctctaaattgtgaaactgacatcttgggtttggcagAGCATCC
127 S I P
841 CAACCCATGGAGTTGCTTCAGGCATGAGTGTCTATTGAAGGAGTAGTAATGGAGATTGTCA
130 T H G V A S G M S A I E G V V M E I V I
901 TAACCTTTGCACTAGTTTACTGTCTATGCCACAGCAGCCGACCCAAAAAGGGAGATT
150 T F A L V Y T V Y A T A A D P K K G D L
961 TGGGAATAATTGCACCCATTGCAATTGGGTTTCATAGTGGGTGCAAACATATTAGCTGCCG
170 G I I A P I A I G F I V G A N I L A A G
1021 GCCCATTTAGCGGTGGCTCGATGAATCCGCGCCGATCATTGGCCAGCTGTGGTTAGCG
190 P F S G G S M N P A R S F G P A V V S G
1081 GTGACTTCTCAGAGAACTGGATCTATTGGGTCGGCCACTAATCGGAGGAGGGTTAGCTG
210 D F S E N W I Y W V G P L I G G G L A G
1141 GGCTTGATACAGTTGCAGTTTATTGGGCTTACTCTGCAGCCCCATCTTCTGAAGAGT
230 L V Y S C S F I G S Y S A A P S S E E Y
1201 ATGCCTAAattgggttgtaatgctttgtttgtgtggttctgtttcttggtttcttctgtct

```

250 A \*

1261 ttggggttgggcttggagaacttgacttcataataaggaaaatgtaataataaattga

1321 atcaagtttgagaatcttttgttgcataatt
