# Supplementary material for: Gene Structures, Evolution, Classification and Expression Profiles of the Aquaporin Gene Family in Castor Bean (Ricinus communis L.)
Source: PubMed Central journal article supplement (PMC4625025; doi:10.1371/journal.pone.0141022), 2015-10-28
Supplement: pone.0141022.s006.pdf [file pone.0141022.s006.pdf]

**S6 File. SDP analysis of castor bean AQP from alignments with amino acid sequences of AQPs transporting non-aqua substrates.** Multiple alignments were performed using ClustalW. Shown is the sequences containing the nine SD positions which are highlighted in yellow and the representative sequences are marked in blue. The Genbank accession numbers: AtPIP1;2 (Q06611), AtPIP2;1 (P43286), AtPIP2;4 (Q9FF53), AtTIP1;1 (P25818), AtTIP1;2 (Q41963), AtTIP1;3 (NP\_192056), AtTIP2;1 (Q41951), AtTIP2;3 (Q9FGL2), AtTIP4;1 (O82316), AtTIP5;1 (NP\_190328), AtNIP1;1 (CAA16760), AtNIP1;2 (Q8LFP7), AtNIP5;1 (NP\_192776), AtNIP6;1 (NP\_178191), CmNIP2;1 (BAK09176), CpNIP1 (CAD67694), GmNOD26 (P08995), GmNIP2;1 (XP\_003534451), GmNIP2;2 (NP\_001240190), HvPIP1;3 (BAA23745), HvPIP1;4 (BAF33068), HvPIP2;1 (BAA23744), HvNIP2;1 (BAH24163), NtAQP1 (O24662), NtTIPa (Q9XG70), NtXIP1;1 $\alpha$  (ADO66667), NtXIP1;1 $\beta$  (ADO66666), OsNIP2;1 (Q6Z2T3), OsNIP2;2 (Q67WJ8), OsNIP3;2 (Q7EYH7), SIXIP1;1 $\alpha$  (ADO66672), SIXIP1;1 $\beta$  (ADO66671), StXIP1;1 $\alpha$  (ADO66669), StXIP1;1 $\beta$  (ADO66670), TaLsi1 (ADM47602), TaTIP2;1 (AAS19468), TaTIP2;2 (AAS19469), TgTIP1;1 (BAL41683), TgTIP1;2 (BAL41684), ZmPIP1;1 (Q41870), ZmPIP1;5 (Q9AR14), ZmNIP2;1 (Q19KC1), ZmNIP2;2 (Q9ATN2).

**Ammonia (NH<sub>3</sub>) Transporters**

```
RcTIP2;2      TGIFYWIAQCLGSIVACLLQFVTNGKSIPTHGVASGMSAIEGVVMEIVITFALVYTVYA
RcNIP1;1     QVPAYIACQVIGSTLAAGTIRLIFTGKQDHF TGTMPAGSDMQSFVVEFIITFYLMFIISG
AtTIP2;1     TGVFVWIAQLLQGSTAACFLLKYVTGGLAVPTHSVAAGLGSIEGVVMEIITFALVYTVYA
AtTIP2;3     TGFFYWIAQCLGSIVACLLVFTNGKSVPTHGVSAGLGAVEGVVMEIVVTFALVYTVYA
TaTIP2;1     TGIFYWVAQLLGAIVGAFVLFVQFCT-GVATPTHGLS-GVGAFEGVVMEIIVTFGLVYTVYA
TaTIP2;2     TGIFYWVAQLLGAIVGAFVLFVQFCT-GVATPTHGLS-GVGAFEGVVMEIIVTFGLVYTVYA
GmNOD26      QVPAYVVAQLLGSILASGTLRLLFMGNHDSGTVPNGTNLQAFVFEFIMTFFFLMFVICG
              *  . *  : * :  . .  :      *      .      . . . * . * : : * *  * : :  .
```

```
RcTIP2;2      TAADPKKGDLDGIIAPIAIGFIVGANILAAGPFSGGSMNPARSFGPAVVSDFSENWIYWV
RcNIP1;1     VATDNR--AIGELAGLAVGATVLLNVMFAGPISGASMNPARSLGPAIVSHKYKGLWIYIV
AtTIP2;1     TAADPKKGLGTIAPLAIGLIVGANILAAGPFSGGSMNPARSFGPAVAAGDFSGHWVYVW
AtTIP2;3     TAADPKKGLGTIAPLAIGFIVGANILAAGPFSGGSMNPARSFGPAVVSDFLSQIWIYWV
TaTIP2;1     TAADPKKGLGTIAPLAIGFIVGANILVAGPFSGGSMNPARSFGPAVASGDFTNIIWVYWA
TaTIP2;2     TAADPKKGLGTIAPLAIGFIVGANILVAGPFSGGSMNPARSFGPAVASGDFTNIIWVYWA
GmNOD26      VATDNR--AVGEFAGIAIGSTLLLNVIIGGPVTGASMNPARSLGPAFVHGVEYEGIWIYLL
              . * : * :  : * : * : * : * :  * : :  . * . : * . * * * * * * * * * * * * . .  * : *
```

```
RcTIP2;2      GPLIGGGLAGLVYSCSFIGSYSAAPSSSEYYA-----
RcNIP1;1     SPTLGAQAGAWVYVMIRYTDKPLREITKSASFLKSTGRA-
AtTIP2;1     GPLIGGGLAGLIYGNVFMGSSSEHVPLASADF-----
AtTIP2;3     GPLVGGALAGLIYGDVFIGSYEAVETREIRV-----
TaTIP2;1     GPLIGGGLAGVVYRYLYMCD-DHSSVAGNDY-----
TaTIP2;2     GPLIGGGLAGVVYRYVYMCD-DHSSVAGNDY-----
GmNOD26      APVVGAIAGAWVYVIRYTDKPLSETTKSASFLKGRAASK
              . * : * .  . .  : *      .      .
```

## Boric Acid Transporters

RcPIP1;1 VGIQGIAWAFGGMIFALVYCTAGISGGHINPAVTFGLFLARKLSLTRA VFYIMQCLGAI  
RcPIP1;2 VGIQGIAWAFGGMIFALVYCTAGISGGHINPAVTFGLFLARKLSLTRA L FYMVMQCLGAI  
RcPIP1;3 VGIQGIAWAFGGMIFALVYCTAGISGGHINPAVTFGLFLARKLSLTRA L FYMVMQCLGAI  
RcPIP1;4 VGTQGIAWAFGGMIFALVYCTAGISGGHINPAVTFGLFLARKLSLTRA L FYMVMQCLGAI  
RcPIP1;5 VGVQGIAWAFGGMIFALVYCTAGISGGHINPAVTFGLLLARKLSLNR AI FYMVMQCLGAI  
RcNIP5;1 ETLIGNAACAGLAVMIIILSTGHI SGAHLNPSLTIAFAALRHFPWV QVPAYIAAQVSASI  
HvPIP1;3 VGIQGIAWSFGGMIFVLVYCTAGISGGHINPAVTFGLFLARKLSLTRA VFYIVMQCLGAI  
HvPIP1;4 VGIQGIAWSFGGMIFVLVYCTAGISGGHINPAVTFGLFLARKLSLTRA VFYIVMQCLGAI  
ZmPIP1;1 VGIQGIAWSFGGMILALVYCTAGISG-HINPAVTFGLFLARKLSLTRA VFYIIMQCLGAI  
OsNIP2;1 ISQLGQSIAGGLIVTVMIIYAVGHI SGAHMNPAVTLAFAVFRHFPW IQVPFYWAAQFTGAI  
AtNIP5;1 ETLIGNAACAGLAVMIIILSTGHI SGAHLNPSLTIAFAALRHFPW AHVPAYIAAQVSASI  
AtNIP6;1 ETLIGCAASAGLAVMIVILSTGHI SGAHLNPAVTIAFAALKHFPWK HVPYIGAQVMSV  
NtXIP1;1 $\alpha$  MPNLIMSILIAIVITILLLAVVPVSGGHINPVISFSAALVGI I SMSRAI IYMVAQC VGAI  
NtXIP1;1 $\beta$  MPNLIMSILIAIVITILLLAVVPVSGGHINPVISFSAALVGI I SMSRAI IYMVAQC VGAI  
StXIP1;1 $\alpha$  MPNLIMSILIAVVITILLLAVVPVSGGHINPVISFSAALVGI I SMSRAI IYIVAQC LGAV  
StXIP1;1 $\beta$  MPNLIMSILIAVVITILLLAVVPVSGGHINPVISFSAALVGI I SMSRAI IYIVAQC LGAV  
: . : :. . : \*\* \* : \*\* : . : . \* \* : . :

RcPIP1;1 CGAGVVKALEKGHEYERLGGG-----ANTVSSGYSGKDGLGAE I VGT F I L V Y T V  
RcPIP1;2 CGAGVVKGFEGSHDYTRLGGG-----ANSVNPGYTKGDGLGAE I VGT F V L V Y T V  
RcPIP1;3 CGAGVVKGFEGSHDYTRLGGG-----ANSVNPGYTKGDGLGAE I VGT F V L V Y T V  
RcPIP1;4 CGAGVVKGFEGDRTYETLGGG-----ANVVNAGYTKGDGLGAE I VGT F V L V Y T V  
RcPIP1;5 CGAGVVKGFQF-TPYERVGGG-----ANMVNPGYSKGDGLGAE I VGT F V L V Y T V  
RcNIP5;1 CASFALKGVFHFPMMSG-----GVTVP SVSTGQAFAL EFLITFNLLFV V  
HvPIP1;3 CGAGVVKGFQT-TLYQGNNGG-----ANSVAAGYTKGDGLGAE I VGT F V L V Y T V  
HvPIP1;4 CGAGVVKGFQT-TLYQGNNGG-----ANSVAAGYTKGDGLGAE I VGT F V L V Y T V  
ZmPIP1;1 CGRGVVKGFQQ-GLYMGNGR-----RNVVAPGYTKGDGLGAE I VGT F I L V Y T V  
OsNIP2;1 CASFVLKAVIHPVDVI-----GTTTPVGPWHWSL VVEVIVTFNMMFV T  
AtNIP5;1 CASFALKGVFHFPMMSG-----GVTIPSVSLGQAFAL EFIITFILLFV V  
AtNIP6;1 SAAFALKAVFEPTMSG-----GVTVP TVGLSQAFAL EFIISFNLMFV V  
NtXIP1;1 LGALALKAVVSSTIAQTFS LGGCTITVIAPGPNGPITVGL EMAQALWLEIFCTFVFLFAS  
NtXIP1;1 $\beta$  LGALALKAVVSSTIAQTFS LGGCTITVIAPGPNGPITVGL EMAQALWLEIFCTFVFLFAS  
StXIP1;1 $\alpha$  LGALALRAVVSSSIEDTFS LGGCTVTIIAPGPNGPVTVGL ETAQALWLEIFCTFVFLFAS  
StXIP1;1 $\beta$  LGALALRAVVSSSIEDTFS LGGCTVTIIAPGPNGPVTVGL ETAQALWLEIFCTFVFLFAS  
. : : : . . . . : . . . : \* . . : \* : : . .

RcPIP1;1 FSATDAKRNARDS---HVPI LAPLP IGFAVFLVH L ATIP---ITGTGINPARSLGAALIYN  
RcPIP1;2 FSATDAKRSARDS---HVPI LAPLP IGFAVFLVH L ATIP---ITGTGINPARSLGAAI IFN  
RcPIP1;3 FSATDAKRSARDS---HVPI LAPLP IGFAVFLVH L ATIP---ITGTGINPARSLGAAI IFN  
RcPIP1;4 FSATDAKRNARDS---HVPI LAPLP IGFAVFLVH L ATIP---ITGTGINPARSLGAAI IFN  
RcPIP1;5 FSATDAKRSARDS---HVPV LAPLP IGFAVFLVH L ATIP---ITGTGINPARSLGAAI IYN  
RcNIP5;1 TAVATDTR-----AVGELAGI AVGATVMLN ILVAGP---SSGSMNPVRTLGPAVAAG  
HvPIP1;3 FSATDAKRSARDS---HVPI LAPLP IGFAVFLVH L ATIP---ITGTGINPARSLGAAI IYN  
HvPIP1;4 FSATDAKRSARDS---HVPILAPLP IGFAVFLVH L ATIP---ITGTGINPARSLGAAI IYN  
ZmPIP1;1 FSATDAKRARDS---HVPI LAPLP IGFAVFLVH L ATMG---ITGTGINPARSLGAAI IYN  
OsNIP2;1 LAVATDTR-----AVGELAGLAVGSAVCITSI FAGA---ISGSMNPARTLGPALASN  
AtNIP5;1 TAVATDTR-----AVGELAGI AVGATVMLN ILVAGP---STGSMNPVRTLGPAVASG  
AtNIP6;1 TAVATDTR-----AVGELAGI AVGATVMLN ILIAGP---ATSASMN PVRTLGPAIAAN  
NtXIP1;1 $\alpha$  IWMAYDHRQAKALGLVTVLSIVGLVGLL VFI STT V T M K K Y A G A G M N P A R C F G A A V V R G  
NtXIP1;1 $\beta$  IWMAYDHRQAKALGLVTVLSIVGLVGLL VFI STT V T M K K Y A G A G M N P A R C F G A A V V R G  
StXIP1;1 $\alpha$  IWMAYDHRQAKALGHVTVLSIVGLVGLL VFI STT V T A K K Y G G A G I N P A R C L G P A I I R G  
StXIP1;1 $\beta$  IWMAYDHRQAKALGHVTVLSIVGLVGLL VFI STT V T A K K Y G G A G I N P A R C L G P A I I R G  
: \* \* : . : : \* \* : : . : : \*\* . \* : \* . \* : .

## Carbon dioxide (CO<sub>2</sub>) Transporters

```
RcPIP1;1      GGHINPAVTFGLFLARKLSLTRAVFYIMVMQCLGAICGAGVVKALEKGHEYERLGGGANTV
RcPIP1;3      GGHINPAVTFGLFLARKLSLTRALFYVMVMQCLGAICGAGVVKGFEGSHDYTRLGGGANSV
RcPIP1;4      GGHINPAVTFGLFLARKLSLTRALFYVMVMQCLGAICGAGVVKGFEGDRTYETLGGGANVV
RcPIP1;5      GGHINPAVTFGLLLARKLSLNRAIFYMVMQCLGAICGAGVVKGFQ-PTPYERVGGGANMV
RcPIP2;2      GGHINPAVTFGLFLARKVSLVRAIMYVAQCLGAICGVGLVKAFQ-SSHVKRYGGGANTL
RcPIP2;4      GGHINPAVTFGLFLARKVSLIRAVAYMVAQCLGAICGVGLVKAFM-KNPNYRLGGGANSV
AtPIP1;2      GGHINPAVTFGLFLARKLSLTRAVYYYIVMQCLGAICGAGVVKGFQ-PKQYQALGGGANTI
NtAQP1        GGHINPAVTFGLFLARKLSLTRAFYIVMQCLGAICGAGVVKGFQ-VGPYQRLGGGANVV
HvPIP2;1      GGHINPAVTFGLFLARKVSLIRALLYTIAQCLGAICGVGLVKGFQ-SSYYVRYGGGANEL
*****:***:* * *: *.: *****.*:*.*.: * ***** :

RcPIP1;1      SSGYSKGDGLGAEIVGTFVLVYTVFSATDAKRNARDSHVPILAPLPIGFAVFLVHLATIP
RcPIP1;3      NPGYTKGDGLGAEIVGTFVLVYTVFSATDAKRSARDSHVPILAPLPIGFAVFLVHLATIP
RcPIP1;4      NAGYTKGDGLGAEIVGTFVLVYTVFSATDAKRNARDSHVPILAPLPIGFAVFLVHLATIP
RcPIP1;5      NPGYSKGDGLGAEIVGTFVLVYTVFSATDAKRSARDSHVPILAPLPIGFAVFLVHLATIP
RcPIP2;2      DDNYSTGVGLGAEIIGTFVLVYTVFSATDPKRSARDSHVPILAPLPIGFAVFMVHLATIP
RcPIP2;4      ASGYSNGTALGAEIIGTFVLVYTVFSATDPKRSARDSHVPILAPLPIGFAVFMVHLATIP
AtPIP1;2      AHGYTKGSLGAEIIGTFVLVYTVFSATDAKRNARDSHVPILAPLPIGFAVFLVHLATIP
NtAQP1        NHGYTKGDGLGAEIIGTFVLVYTVFSATDAKRNARDSYVPELAPLPIGFAVFLVHLATIP
HvPIP2;1      SAGYSKGTGLAAEIIIGTFVLVYTVFSATDPKRNARDSHIPVLAAPLPIGFAVFMVHLATIP
. *: . * . * . ***:***:*****.*.*.***:.*:*****:*****

RcPIP1;1      ITGTGINPARSLGAALIYNKDQAWDDHWIFWVGPFIGAALAALYHQIVIRAI PFQSK---
RcPIP1;3      ITGTGINPARSLGAALIFNKDQGWDDHWIFWVGPFIGAALAALYHQVVIRAI PFKKC---
RcPIP1;4      ITGTGINPARSLGAALIFNKDQAWDDHWIFWVGPFIGAALAALYHQIVIRAI PFKSRA--
RcPIP1;5      ITGTGINPARSLGAALIFNKDQAWDDHWIFWVGPFIGAALAALYHQIIRAI PFKARA--
RcPIP2;2      ITGTGINPARSLGAAVIYNQDKAWDDQWIFWVGPFIGAAIAAFYHQFILRAGAVKALGSF
RcPIP2;4      ITGTGINPARSFGAAVIYNNDKVVDDHWIFWVGPFVGAALAAAAYHQYVLRAGAIIKALGSF
AtPIP1;2      ITGTGINPARSLGAALIFNKDQAWDDHWIFWVGPFIGAALAALYHVIVIRAI PFKSRS--
NtAQP1        ITGTGINPARSLGAALIFNTDQAWDDHWIFWVGPFIGAALAALYHQIIRAI PFHKSS--
HvPIP2;1      ITGTGINPARSLGAAVIYNNDKAWDDQWIFWVGPLIGAAIAAAYHQYVLRASAAL-LGSY
*****:***:* * *: *.: *****:*** ** ** :.* * :
```

## H<sub>2</sub>O<sub>2</sub> Transporters

RcPIP1;1 AFGGMIFALVYCTAGISGGHINPAVTFGLFLARKKLSLTRAVFYMIMQCLGAICGAGVVKA  
RcPIP1;2 AFGGMIFALVYCTAGISGGHINPAVTFGLFLARKKLSLTRALFYMVMQCLGAICGAGVVKG  
RcPIP1;3 AFGGMIFALVYCTAGISGGHINPAVTFGLFLARKKLSLTRALFYMVMQCLGAICGAGVVKG  
RcPIP1;4 AFGGMIFALVYCTAGISGGHINPAVTFGLFLARKKLSLTRALFYMVMQCLGAICGAGVVKG  
RcPIP1;5 AFGGMIFALVYCTAGISGGHINPAVTFGLLLARKKLSLNRAIFYMVMQCLGAICGAGVVKG  
RcPIP2;1 AFGGMIFILVYCTAGISGGHINPAVTFGLFLARKVSLVRAIMYMAAQCLGAICGCVLVKA  
RcPIP2;2 AFGGMIFILVYCTAGISGGHINPAVTFGLFLARKVSLVRAIMYMVAQCLGAICGCVLVKA  
RcPIP2;3 AFGGMIFILVYCTAGISGGHINPAVTFGLFLGRKVSILRALGYMVAQCLGAICGCVLVKA  
RcPIP2;4 AFGGMIFILVYCTAGISGGHINPAVTFGLFLARKVSLIRAVAYMVAQCLGAICGCVLVKA  
RcPIP2;5 AFGAMIFVLVYCTAGISGGHINPAVTFGLLVARKVSLDRAVSYMISQCLGAICGCVLVKA  
RcTIP5;1 ANAFALSSAVYIAANISGGHVNPAVTFGMAIGGHISVPTALFYWVSQLVASVMACLLLRV  
RcNIP2;1 AGGLIVTVMIIYAVGHVSGAHMNPVTTAFAAVRHFPWKEVPYAAAQLTGAIASASFTLVK  
RcNIP3;1 AWGVVLMALIYAVGHVSGAHFNPAVSI AFAAGRKF PWKHVPMYILAQVLGSTLASLTLRV  
RcNIP4;2 TWGLIVAVMIYSVGHISGAHFNPAVTITSAIFHRFPMHEVPLYIVAQVMGSILASGTLAL  
RcNIP5;1 CAGLAVMI I I LSTGHISGAHLNPSLTI AFAALRHFPWVQVPAYIAAQVSASICASFALKG  
RcXIP1;1 AVFFIAFLWLMVTVPLSGGLFSPA F S FIAALRGVITFVRALFYSLGQLL GALIAYLILKG  
RcXIP1;2 VVFLIAFFWLLTTVPLSGGFFSPTFFAFMAALSGVISFVRALFYCLGQCFGAIIGYMI LKS  
RcXIP1;3 AVFFIALFWLLPTVPLSGGFFSPTFFMAALRGVISFTRALFYCLGQCLGAIIGYI I LKS  
AtPIP2;5 AFGGMIFILVYCTAGISGGHINPAVTFGLLLARKVTLVRAVMYMAAQCLGAICGVALVKA  
AtPIP2;1 AFGGMIFILVYCTAGISGGHINPAVTFGLFLARKVSLPRALLYIIAQCLGAICGVGFVKA  
AtPIP2;2 AFGGMIFILVYCTAGISGGHINPAVTFGLFLARKVSLIRAVLYMVAQCLGAICGVGFVKA  
AtPIP2;4 AFGGMIFVLVYCTAGISGGHINPAVTVGLFLARKVSLVRTVLYIVAQCLGAICCGGFVKA  
ZmPIP2;5 AFGGMIFILVYCTAGVSGGHINPAVTFGLFLARKVSLVRALLYIVAQCLGAICGVGLVKG  
AtPIP2;7 AFGGMIFVLVYCTAGISGGHINPAVTFGLFLARKVSLVRALGYMIAQCLGAICGVGFVKA  
NtXIP1;1 $\alpha$  LIAIVITILLLAVVPVSGGHINPVISFSAALVGIISMSRAI IYMVAQCVGAILGALALKA  
NtXIP1;1 $\beta$  LIAIVITILLLAVVPVSGGHINPVISFSAALVGIISMSRAI IYMVAQCVGAILGALALKA  
StXIP1;1 $\alpha$  LIAVVITILLLAVVPVSGGHINPVISFSAALVGIISMSRAI IYIVAQCLGAVLGALALRA  
StXIP1;1 $\beta$  LIAVVITILLLAVVPVSGGHINPVISFSAALVGIISMSRAI IYIVAQCLGAVLGALALRA  
SlXIP1;1 $\alpha$  LIAVVITILLLAVVPVSGGHINPVISFSAALVGIISMSRAI IYIVAQCVGAILGALALRA  
SlXIP1;1 $\beta$  LIAVVITILLLAVVPVSGGHINPVISFSAALVGIISMSRAI IYIVAQCVGAILGALALRA  
AtTIP1;1 AHAFGLFVAVSVGANISGGHVNPAVTFGAFIGGNITLLRGILYWIAQLLGSVVA CLILKF  
AtTIP1;2 AHAFGLFVAVSVGANISGGHVNPAVTFGVLLGGNITLLRGILYWIAQLLGSVAACFLLSF  
TgTIP1;1 AHAFALFVAVSVGANISGGHVNPAVTFGAFLLGGNITLLRGVLYIIAQLLGSSVACL LRF  
TgTIP1;2 AHAFALFVAVSVGANISGGHVNPAVTFGASLGGNITLLRGVLYIIAQLLGSSVACL LRF  
AtTIP2;3 AHAFALFVGVSI AANISGGHVNPAVTLGLAIGGNITLITGFFYWIAQCLGSIVACL LRVF  
AtNIP1;2 VWGLTVMVLVYSLGHISGAHFNPAVTIAFASCRFPLKQVPAYVISQVIGSTLAAATLRL  
: : \*\* . . \* . : . . \* \* . : . :

RcPIP1;1 LEKGHEYER--LGGGAN-TVSSG-----YSKGDGLGAEIVGTFILVYTVFSATDAKR  
RcPIP1;2 FEGSHDYTR--LGGGAN-SVNPG-----YTKGDGLGAEIVGTFVLVYTVFSATDAKR  
RcPIP1;3 FEGSHDYTR--LGGGAN-SVNPG-----YTKGDGLGAEIVGTFVLVYTVFSATDAKR  
RcPIP1;4 FEGDRTYET--LGGGAN-VVNAG-----YTKGDGLGAEIVGTFVLVYTVFSATDAKR  
RcPIP1;5 FQP-TPYER--VGGGAN-MVNPG-----YSKGDGLGAEIVGTFVLVYTVFSATDAKR  
RcPIP2;1 FQR-AYYN--RYGGGAN-ELADG-----YSTGTGLGAEIIGTFVLVYTVFAATDPKR  
RcPIP2;2 FQS-SHYK--RYGGGAN-TLDDN-----YSTGVGLGAEIIGTFVLVYTVFSATDPKR  
RcPIP2;3 FQK-AYYN--RYGGGAN-ELADG-----YNKGTGLGAEIIGTFVLVYTVFSATDPKR  
RcPIP2;4 FMK-NPYN--RLGGGAN-SVASG-----YSNGTALGAEIIGTFVLVYTVFSATDPKR  
RcPIP2;5 FME-HDYINITLGGGAN-SVATG-----YSKGAALGAEIVGTFVLVYTVFSATDPKR  
RcTIP5;1 AAVGQNLPT-----YIIAEE-----MTGFGASIVEGVLTFGLVYTVYA-AGDPR  
RcNIP2;1 LLHPVKH-----IGTTSPS-----GSDFQALVMEIVVTFMFMFVTSAVATDTK  
RcNIP3;1 LFNDLDD-----IEVTVTQYKDS-----TSDLEAIIWEIFIITFILMFNILAVATDYR  
RcNIP4;2 VV-DVNP-----KAYFGTVPV-----GSNWQSLIMEI IITFLLMFVISGVTTDDR  
RcNIP5;1 VFHFPMSG-----GVTVPS-----VSTGQAFALFLITFNLLFVVTAATDTR  
RcXIP1;1 VMDPNMAHKYALAGCMVNGNGAG-----VSVGTALIEIILCTFMVLYVAMTIIIDKQ  
RcXIP1;2 VMDPTIAHKYALGGCMVNGGEG-----VSAGTALMVEFSCFVLVYVAMTIIIDKK  
RcXIP1;3 VMDPTIAHKYALGGCMVNGGEG-----VSAGTALMIEFSCFVLVYVAMTIVLDKK  
AtPIP2;5 FQS-AYFT--RYGGGAN-GLSDG-----YSIGTGVAEEIIGTFVLVYTVFSATDPKR  
AtPIP2;1 FQS-SYYT--RYGGGAN-SLADG-----YSTGTGLAAEIIGTFVLVYTVFSATDPKR  
AtPIP2;2 FQS-SYYD--RYGGGAN-SLADG-----YNTGTGLAAEIIGTFVLVYTVFSATDPKR  
AtPIP2;4 FQS-SYYT--RYGGGAN-ELADG-----YNKGTGLGAEIIGTFVLVYTVFSATDPKR  
ZmPIP2;5 FQS-AFYV--RYGGGAN-ELSAG-----YSKGTGLAAEIIGTFVLVYTVFSATDPKR  
AtPIP2;7 FMK-TPYN--TLGGGAN-TVADG-----YSKGTALGAEIIGTFVLVYTVFSATDPKR  
NtXIP1;1 $\alpha$  VVSSTIAQTFSLGGCTITVIAPGPNGPITVGLEMAQALWLEIFCTFVFLFASIWMAYDHR  
NtXIP1;1 $\beta$  VVSSTIAQTFSLGGCTITVIAPGPNGPITVGLEMAQALWLEIFCTFVFLFASIWMAYDHR  
StXIP1;1 $\alpha$  VVSSSIEDTFSLGGCTVTIIAPGPNGPVTVGLETAQALWLEIFCTFVFLFASIWMAYDHR  
StXIP1;1 $\beta$  VVSSSIEDTFSLGGCTVTIIAPGPNGPVTVGLETAQALWLEIFCTFVFLFASIWMAYDHR  
SlXIP1;1 $\alpha$  VVSSSIEDTFSLGGCTVTIIAPGPNGPVIIVGLETAQALWLEIFCTFVFLFASIWMAYDHR  
SlXIP1;1 $\beta$  VVSSSIEDTFSLGGCTVTIIAPGPNGPVIIVGLETAQALWLEIFCTFVFLFASIWMAYDHR  
AtTIP1;1 ATGGLAVPA-----FGLSAG-----VGVLNAFVFEIVMTFGLVYTVYATAIDPK  
AtTIP1;2 ATGGPIPA-----FGLSAG-----VGSLNALVFEIVMTFGLVYTVYATAVDPK  
TgTIP1;1 TTG-LGTGT-----FGLVAG-----VSVWSGLVMEIVMTFGLVYTVYATAVDPK  
TgTIP1;2 TTG-LGTGT-----FGLVAG-----VSVWSGLVMEIVMTFGLVYTVYATAVDPK  
AtTIP2;3 VTNGKSVPT-----HGVSAG-----LGAVEGVMEIVVTFALVYTVYATAADPK  
AtNIP1;2 LF-GLDQDVCSGKHDVFGTLP-----GSNLQSFVIEFIIITFYLMFVISGVATDNR

. \* \*\* . : :

RcPIP1;1 NARDS---HVPILAPLPIGFAVFLVHLATIP--ITGTGINPARSLGAALIYNKDQAWDDH  
RcPIP1;2 SARDS---HVPILAPLPIGFAVFLVHLATIP--ITGTGINPARSLGAALIFNKDQGWDEH  
RcPIP1;3 SARDS---HVPILAPLPIGFAVFLVHLATIP--ITGTGINPARSLGAALIFNKDQGWDDH  
RcPIP1;4 NARDS---HVPILAPLPIGFAVFLVHLATIP--ITGTGINPARSLGAALIFNKDHAWDDH  
RcPIP1;5 SARDS---HVPVLAPLPIGFAVFLVHLATIP--ITGTGINPARSLGAALIYNKDHAWDDH  
RcPIP2;1 NARDS---HVPVLAPLPIGFAVFMVHLATIP--VTGTGINPARSFGAAVIYNKEKAWDDQ  
RcPIP2;2 SARDS---HVPVLAPLPIGFAVFMVHLATIP--ITGTGINPARSLGAAVIYNQDKAWDDQ  
RcPIP2;3 SARDS---HVPVLAPLPIGFAVFMVHLATIP--ITGTGINPARSFGAAVIYNKEKAWDDQ  
RcPIP2;4 SARDS---HVPVLAPLPIGFAVFMVHLATIP--ITGTGINPARSFGAAVIYNNDKVWDDH  
RcPIP2;5 KARDS---HVPILAPLPIGFAVFMVHLATIP--ITGTGINPARSLAAAIYNTRKVVDEH  
RcTIP5;1 R-----SLLGATGPLVIGLMAGANVLAAGP--FSGGSMNPACAFGSVVAVAG---RFKNQ  
RcNIP2;1 -----AIGELAGIAVGSAVCITSILAGP--ISGGSMNPARTLGPATASA---YKGI  
RcNIP3;1 -----AVKYLSGVAIGGTLFLNALLAGP--ITGASMNPARSLGPAIVSG---VYKNL  
RcNIP4;2 T-----TAGPLGGIGVGMTILLNVFVAGP--VSGASMNPARSIGPAIVKH---VYKGL  
RcNIP5;1 -----AVGELAGIAVGATVMLNVLVAGP--SSGGSMNPVRTLGPAAVAG---NYRAL  
RcXIP1;1 KCMDLGLTTVCVLIISGIYAASVVFVSITVTGRPGYGGVGLNPARCLGPVLLMG--GALWEGH  
RcXIP1;2 KCQELGLTMVCVLIISGAYAVSVFVSTTGTGRIGYGGVGLNPARCLAPALLLG--GSLWDGH  
RcXIP1;3 KCQDLGLTMVCVLIISGAYAVSVFVSTTGTGRVGYGGVGLNPARCLAPALLLG--GALWDGH  
AtPIP2;5 SARDS---HVPVLAPLPIGFAVFIVHLATIP--ITGTGINPARSLGAALIYNKDKAWDDH  
AtPIP2;1 SARDS---HVPVLAPLPIGFAVFMVHLATIP--ITGTGINPARSFGAAVIYNKSKPWDDH  
AtPIP2;2 NARDS---HVPVLAPLPIGFAVFMVHLATIP--ITGTGINPARSFGAAVIYNKSKPWDDH  
AtPIP2;4 NARDS---HVPVLAPLPIGFAVFMVHLATIP--ITGTGINPARSFGAAVIYNNEKAWDDQ  
ZmPIP2;5 NARDS---HVPVLAPLPIGFAVFMVHLATIP--ITGTGINPARSLGAAVIYNNDKAWDDH  
AtPIP2;7 SARDS---HIPVLAPLPIGFAVFMVHLATIP--ITGTGINPARSFGAAVIYNNEKAWDDQ  
NtXIP1;1 $\alpha$  QAKALGLTVLSIVGIVLGLLVFISTVTMKKGYAGAGMNPARCFGAAVVRG--GHLWDGH  
NtXIP1;1 $\beta$  QAKALGLTVLSIVGIVLGLLVFISTVTMKKGYAGAGMNPARCFGAAVVRG--GHLWDGH  
StXIP1;1 $\alpha$  QAKALGHVTVLSIVGLVGLLVFISTVTAKKGYGGAGINPARCLGPALVIRG--GHLWDGH  
StXIP1;1 $\beta$  QAKALGHVTVLSIVGLVGLLVFISTVTAKKGYGGAGINPARCLGPALVIRG--GHLWDGH  
SlXIP1;1 $\alpha$  QAKALGHVTVLSIVGLVGLLVFISTVTAKKGYGGAGINPARCLGPALVIRG--GHLWDGH  
SlXIP1;1 $\beta$  QAKALGHVTVLSIVGLVGLLVFISTVTAKKGYGGAGINPARCLGPALVIRG--GHLWDGH  
AtTIP1;1 N-----GSLGTIAPIAIGFIVGANILAGGA--FSGASMNPAVAFGPVAVSW---TWTNH  
AtTIP1;2 N-----GSLGTIAPIAIGFIVGANILAGGA--FSGASMNPAVAFGPVAVSW---TWTNH  
TgTIP1;1 K-----GDIGTIAPIAIGFIVGANILVGA--FTGASMNPAIAFGPALVSW---SWTSH  
TgTIP1;2 K-----GDIGTIAPIAIGFIVGANILVGA--FTGASMNPAIAFGPALVSW---SWASH  
AtTIP2;3 K-----GSLGTIAPIAIGFIVGANILAAGP--FSGGSMNPARSFGPAVVS---DLSQI  
AtNIP1;2 -----AIGELAGLAVGSTVLLNVIAGP--VSGASMNPGRSGLGPAMVYS---CYRGL

\* .:\* \* :. . . :

RcPIP1;1 WIFWVGFFIGAALAALYHQIVIRAIIPFQSK-----  
RcPIP1;2 WIFWVGFFIGAALAALYHQVVIRAIIPFKK-----  
RcPIP1;3 WIFWVGFFIGAALAALYHQVVIRAIIPFKK-----  
RcPIP1;4 WIFWVGFFIGAALAALYHQIVIRAIIPFKSRA-----  
RcPIP1;5 WIFWVGFFIGAALAALYHQIIRAIIPFKARA-----  
RcPIP2;1 WIFWVGFFIGAAIAAIYHQYVLRASAALKGSFRSSSNI-----  
RcPIP2;2 WIFWVGFFIGAAIAAFYHQFILRAGAVKALGSFRSNPTV-----  
RcPIP2;3 WIFWVGFFIGAAIAAFYHQYILRAAAIKALGSFRSNA-----  
RcPIP2;4 WIFWVGFFIGAALAAAYHQYVLRAGIKALGSFRSNPTN-----  
RcPIP2;5 WIFWVGPLVGALLAAVYQYVIKGGAIKSLGSFRSSNLM-----  
RcTIP5;1 AVYWVGPLLGATVAGLLYDNVVPDQVDSIRGISDGVGA-----  
RcNIP2;1 WVYIVGPPVGTLLGSWSYNFIRVTDQPLQAI SPRSFSAKLRRIRSTNEQPTNKDPFDAL-  
RcNIP3;1 WVFIIVSPIFGALAATYVYNMLR-VPEPEKSEEKT--KNIFNHLYTATDP-----  
RcNIP4;2 WVYIVGPIVGAAILGASAYNLLR---SPYNQTP-----  
RcNIP5;1 WIYLVAPT LGAIAGAGTYSAVKLRREEEVDP-----PRPVRSFRR-----  
RcXIP1;1 WVFWVGFPCACMIYYAYSLMLPKRGFVRADIEEDI IKLVRASCSGSDCPSCVEKKVTSLY  
RcXIP1;2 WVFWVGFPCACSVYYVFSLLL PKQGFVRADEQQHLIQ LVRSSCLGSESPDYFEGKV----  
RcXIP1;3 WVFWVGFPCACSVYYVCSLMLPKQGFVRADEEQHVLQ LVRSSCLGSESANYPDYFEGKV----  
AtPIP2;5 WIFWVGFFIGAAIAAFYHQFVLRAGAIKALGSFRSQPHV-----  
AtPIP2;1 WIFWVGFFIGAAIAAFYHQFVLRASGSKSLGSFRSAANV-----  
AtPIP2;2 WIFWVGFFIGAAIAAFYHQFVLRASGSKSLGSFRSAANV-----  
AtPIP2;4 WIFWVGFPMIGAAAAAFYHQFILRAAAIKALGSFGSFGSFRSFA-----  
ZmPIP2;5 WIFWVGFFIGAAIAAAYHQYVLRASAAL-LGSSASFSR-----  
AtPIP2;7 WIFWVGFPLGALAAAAYHQYILRASA IKALGSFRSNATN-----  
NtXIP1;1 $\alpha$  WIFWVGP TIACVAFYVYTKIIPPKHFHAD-GYKYDFIGVVKASFGLHE-----  
NtXIP1;1 $\beta$  WIFWVGP TIACVAFYVYTKIIPPKHFHAD-GYKYDFIGVVKASFGLHE-----  
StXIP1;1 $\alpha$  WIFWVGP TIACVAFYVYTKIIPPKHF LAEYGFKHFDFVGVVKALS NV-----  
StXIP1;1 $\beta$  WIFWVGP TIACVAFYVYTKIIPPKHF LAEYGFKHFDFVGVVKALS NV-----  
SlXIP1;1 $\alpha$  WIFWVGP TIACVAFYVYTKIIPPKHF LAEYGFKHFDFVGVVKALS NV-----  
SlXIP1;1 $\beta$  WIFWVGP TIACVAFYVYTKIIPPKHF LAEYGFKHFDFVGVVKALS NV-----  
AtTIP1;1 WVYWAGPLVGGGIAGLIYEVFFINT-THEQLPTTDY-----  
AtTIP1;2 WVYWAGPLVGGGIAGLIYDFVFDENAHEQLPTTDY-----  
TgTIP1;1 WVYWAGPLVGGGIAGIVYDLFFINS-THEQLPSTDY-----  
TgTIP1;2 WVYWAGPLVGGGIAAIVYDLFFISG-THEQLPTTDY-----  
AtTIP2;3 WIYWVGPLVGGALAGLIYGDVFIGS--YEA VETREIRV-----  
AtNIP1;2 WIYIVSPIVGA VSGAWVYNMRYTDPKPLREITKS--GSFLKTVRNGSSR-----  
:: ..\* . .

## Silicic Acid Transporters

|           |                                                                           |
|-----------|---------------------------------------------------------------------------|
| RcNIP2;1  | VRHFPWKEVPYYAAAQLTGAISSASFTLKVLLHPVKHIGTTSPPSGSDFQALVMEIVVTFM             |
| HvNIP2;1  | FRHFPWIQVPFYWAAQFTGAICASFVLKAVLHPITVIGTTEPVGPHWHALVIEVVVTFNM              |
| TaLsi1    | FRHFPWIQVPFYWAAQFTGAICASFVLKAVLHPITVIGTTEPVGPHWHALVIEVVVTFNM              |
| ZmNIP2;1  | FRHFPWIQVPFYWAAQFTGSICASFVLKAVLHPIAVLGTTPGTGPHWHSLVIEIIVTFNM              |
| OsNIP2;1  | FRHFPWIQVPFYWAAQFTGAICASFVLKAVLHPVDVIGTTPVGPHWHSLVVEVIVTFNM               |
| ZmNIP2;2  | FRHFPWIQVPFYWAAQFTGAMCAAFVLKAVLHPIAVIGTTPSGPHWHALLIEIVVTFNM               |
| OsNIP2;2  | FRHFPWIQVPFYWAAQFTGAMCAAFVLRAVLYPIEVLGTTPGTGPHWHALVIEIVVTFNM              |
| CmNIP2;1a | TRHFPWKQVPLYAAAQLSGATCAAFTLRLLHPIKHLGTTTPSGSDLQALVMEIVVTFSM               |
| CpNIP1    | TRHFPWKQVPLYAAAQLSGATCAAFTLRLLHPIKHLGTTTPSGSDLQALVMEIVVTFSM               |
| CmNIP2;1b | TRHFPWKQVPLYAAAQLSGATCAAFTLRLLHPIKHLGTTTPSGSDLQALVMEIVVTFSM               |
| GmNIP2;1  | VRHLPWPQLPFYIAAQLTGAISSASYTLRELLRPSNEIGGTSPAGSHIQALIMEMVTTYTM             |
| GmNIP2;2  | VRHLPWPQLPFYVAAQLTGAISSASYTLRELLRPSDEIGGTSPAGSHIQALIMEMVSTYTM             |
|           | *:*:* *:* *:* *:*:*:*:* .:*:*:*:*:* :*: * :* * * * . :*::*:*:* *:* *      |
|           |                                                                           |
| RcNIP2;1  | MFVTSAVATDTKAIGELAGLAVGSAVCITSILAGPISGGSMNPARTLGPALIASAYYKGIW             |
| HvNIP2;1  | MFVTLAVATDTRAVGELAGLAVGSSVCITSIFAGAVSGGSMNPARTLGPALASNRYPLGLW             |
| TaLsi1    | MFVTLAVATDTRAVGELAGLAVGSSVCITSIFAGAVSGGSMNPARTLGPALASNRYPLGLW             |
| ZmNIP2;1  | MFVTLAVATDTRAVGELAGLAVGSAVCITSIFAGAVSGGSMNPARTLGPALASNLYTGLW              |
| OsNIP2;1  | MFVTLAVATDTRAVGELAGLAVGSAVCITSIFAGAVSGGSMNPARTLGPALASNKFDGLW              |
| ZmNIP2;2  | MFVTCAVATDSRAVGELAGLAVGSAVCITSIFAGPVSGGSMNPARTLAPAVASNVFTGLW              |
| OsNIP2;2  | MFVTCAVATDSRAVGELAGLAVGSAVCITSIFAGPVSGGSMNPARTLAPAVASNVYTGLW              |
| CmNIP2;1a | MFVTCAVATDTKAVGELAGLAVGSAVCITSILAGPVSGGSMNPVRTLGPAMASDNYKGLW              |
| CpNIP1    | MFVTCAVATDTKAVGELAGLAVGSAVCITSILAGPVSGGSMNPVRTLGPAMASDNYKGLW              |
| CmNIP2;1b | MFVTCAVATDTKAVGELAGLAVGSAVCITSILAGPVSGGSMNPVRTLGPAMASDNYKGLW              |
| GmNIP2;1  | VFISMAVATDSNATGQLSGVAVGSSVCIASIVAGPISGGSMNPARTLGPALIASYKGLW               |
| GmNIP2;2  | VFISMAVATDSNATGQLSGVAVGSSVCIASIVAGPISGGSMNPARTLGPALIASYKGLW               |
|           | *:*:* *:*:*:*:* *:*:*:*:*:*:*:*:*:*:*:*:*:*:*:*:*:*:*:*:*:*:*:*:*:*:*:*:* |
|           |                                                                           |
| RcNIP2;1  | VYIVGPVVGTLGWSYNFIRVTDQPLQAIS--PRSFSAKLRRIRST-NEQPTNKDPFD                 |
| HvNIP2;1  | LYFLGPVLTLSGAWTYTYIRFEDPP--KDA--PQKLSSFKLRRLQSQ-SVAADD-DELD               |
| TaLsi1    | LYFLGPVLTLSGAWTYTYIRFEDPP--KDG--PQKLSSFKLRRLQSQ-SVAADD-DELD               |
| ZmNIP2;1  | IYFLGPVLTLSGAWTYTYIRFEEAPSHKDM--SQKLSSFKLRRLQSQ-SVAVDD-DELD               |
| OsNIP2;1  | IYFLGPVLTLSGAWTYTYIRFEDTP-KEGS--SQKLSSFKLRRLRSQQSIAADDVDEME               |
| ZmNIP2;2  | IYFLGPVLTLSGAWVYTYIRFEEAPAAKD---TQRLSSFKLRRMQSQ--LAADFDTV-                |
| OsNIP2;2  | IYFLGPVVGTLGAWVYTYIRFEEAPAAAGGAAPQKLSSFKLRRLQSQ-SMAADFENV-                |
| CmNIP2;1a | VYFVGLVTGTLGAWSYKFIKIRASDKPVHLIS--PHSFS-LKLRMSRS-DVGEGE----               |
| CpNIP1    | VYFVGPVTGTLGAWSYKFIKIRASDKPVHLIS--PHSFS-LKLRMSRS-DVGEGE----               |
| CmNIP2;1b | VYFVGPVTGTLGAWSYKFIKIRASDKPVHLIS--PHSFS-LKLRMSRS-DVGEGE----               |
| GmNIP2;1  | VYFVGPIITGAVLAAWSYNVIRDTEHPGFPIS--LSSIS-SKVRQSIGGTEQKSDQRCLV-             |
| GmNIP2;2  | VYFVGPIITGAVLAAWSYNVIRDTEHPGFPIS--LSSIS-SKVRQSIGGTEQKSDQRCLV-             |
|           | *:*:* *:*:*:*:* .:* * . * * : * : * * * * * : * * * * * :                 |



## Urea Transporters

RcPIP1;1 SK-----CSTVGIQGIAWAFGGMIFALVYCTAGISGGHINPAVTFGLFLARKLSLTRAV  
RcPIP1;2 TK-----CSTVGIQGIAWAFGGMIFALVYCTAGISGGHINPAVTFGLFLARKLSLTRAL  
RcPIP1;3 TK-----CSTVGIQGIAWAFGGMIFALVYCTAGISGGHINPAVTFGLFLARKLSLTRAL  
RcPIP1;4 NK-----CATVGTQGIAWAFGGMIFALVYCTAGISGGHINPAVTFGLFLARKLSLTRAL  
RcPIP1;5 NK-----CASVGVQGIAWAFGGMIFALVYCTAGISGGHINPAVTFGLLARKLSLNRAI  
RcPIP2;1 DPAKNADACGGVGILGIAWAFGGMIFILVYCTAGISGGHINPAVTFGLFLARKVSLVRAI  
RcPIP2;3 DPDKNADACGGVGILGIAWAFGGMIFILVYCTAGISGGHINPAVTFGLFLGRKVSILRAL  
RcPIP2;2 E----SDSCGGVGILGIAWAFGGMIFILVYCTAGISGGHINPAVTFGLFLARKVSLVRAI  
RcPIP2;4 DP-----CGGVGILGIAWAFGGMIFILVYCTAGISGGHINPAVTFGLFLARKVSLIRAV  
RcPIP2;5 SP-----CDGVGILGIAWAFGAMIFVLVYCTAGISGGHINPAVTFGLLVARVSLDRAV  
RcTIP1;1 NNG----AATPSGLVAAAIAHAFALFVAVSVGANISGGHVNPVTFGAFVGGHITLLRGI  
RcTIP1;2 DGG----STTPSGLVAASLSHAFALFVAVSVGANISGGHVNPVTFGAFVGGHITLLRGI  
RcTIP1;3 SDG----ATTPAGLVAASLAHGFALFVAVSVGANISGGHVNPVTFGAFVGGHITFIRSI  
RcTIP1;4 DDG----SSTPAAIIMASLAHAFGLFVGVSTAANISGGHCNPAVTFGAFVGGHITLLRGI  
RcTIP2;1 SDA----ALDPAGLVAAIAICHGFALFVAVSVGANISGGHVNPVTFGLLGGQITILTGI  
RcTIP2;2 TDA----ALDPPGLVAVAVAHAFGLFVGVAAIAANISGGHLNPAVTFGLAVGGNITILTGI  
RcTIP3;1 RET----GPPASGLVMVALAHGLALFSAVSASINISGGHLNPAVTFGALVGGRISVVLAF  
RcTIP4;1 GD-----SLVGLFFVAMAHTLVAVMISAG-HISGGHLNPAVTLGLLAGGHITVVRSI  
RcTIP5;1 P-----AADPSNLVIVALANAFALSSAVYIAANISGGHVNPVTFSMIAVGGHISVPTAL  
RcNIP1;1 KV-----VTLPGISIVWGLAVMVLVYVSVGHISGAHFNPAVTLAFATCKRFPWKQVP  
RcNIP2;1 KR-----ISKLGASLAGGLIVTVMYAVGHVSGAHMNPVTTAFAAVRHFPPWKEVP  
RcNIP3;1 -----LTMVGIAIAWGVVLMALIYAVGHVSGAHFNPAVSIAFAGRKFPPWKHVP  
RcNIP4;1 -S-----VTFPGICVWVGLIVMVMVYVSVGHISGAHFNPAVTTITFAIFRQFPYKQVP  
RcNIP4;2 -S-----VTFPGVCVWVGLIVAVMIYVSVGHISGAHFNPAVTTITSAIFHRFPPMHEVP  
RcNIP5;1 GV-----ETLIGNAACAGLAVMIIILSTGHISGAHLNPSLTIAFAALRHFPWVQVP  
RcNIP6;1 GT-----ETLIGLAVSTGLAVMIVILSTGHISGAHLNPSITIAFAALRHFPWKHVP  
RcNIP7;1 GQ-----VGLLEYAATAGLTVIVLVFAIGPISGAHVNPVTTIAFATFGHFPPWSKVP  
CpNIP1 QR-----VSQLGASVAGGLIVTVMYAVGHISGAHMPAVTTAFAAATRHFPPWKQVP  
OsNIP2;1 SR-----ISQLGQSIAGGLIVTVMYAVGHISGAHMPAVTLAFAVFRHFPPWIQVP  
AtNIP6;1 GA-----ETLIGCAASAGLAVMIVILSTGHISGAHLNPAVTTIAFAALKHFPPWKHVP  
NtAQp1 SL-----CSSVGIQGVAVAFGGMIFALVYCTAGISGGHINPAVTFGLFLARKLSLTRA  
ZmPIP1;5 SK-----CATVGIQGIAWSFGGMIFALVYCTAGISGGHINPAVTFGLFLARKLSLTRAL  
AtTIP1;3 GDG----PATPAGLVAASLSHAFALFVAVSVGANVSGGHVNPVTFGAFVGGHITLLRAI  
AtTIP1;1 ENG----AATPSGLVAAAIAHAFGLFVAVSVGANISGGHVNPVTFGAFVGGHITLLRGI  
AtTIP1;2 DNG----ATTPSGLVAAAIAHAFGLFVAVSVGANISGGHVNPVTFGVLLGGNITLLRGI  
AtTIP2;1 SDA----ALDTPGLVAIAVCHGFALFVAVAIKANISGGHVNPVTFGLAVGGQITVITGV  
NtTIPa GD-----PLVSLFFVAMAHALVVAVTISAGFRISGGHLNPAVTLGLCMGGHITVFRSI  
AtTIP4;1 GN-----TLVGLFAVAVAHAFVAVMISAG-HISGGHLNPAVTLGLLLGGHISVFRAF  
AtTIP5;1 AGD----VSGPFGVLIPIAANALALSSSVYISWNVSGGHVNPVTFAMAVAGRISVPTAM  
NtXIP1;1 $\alpha$  VK-----MPNLIMSILIAIVITILLAVVPVSGGHINPVISFSAALVGIISMSRAI  
NtXIP1;1 $\beta$  VK-----MPNLIMSILIAIVITILLAVVPVSGGHINPVISFSAALVGIISMSRAI  
StXIP1;1 $\alpha$  TK-----MPNLIMSILIAVVITILLAVVPVSGGHINPVISFSAALVGIISMSRAI  
StXIP1;1 $\beta$  TK-----MPNLIMSILIAVVITILLAVVPVSGGHINPVISFSAALVGIISMSRAI

. : : : \*\* \* \*\* :: ..

RcPIP1;1 FYMIMQCLGAICGAGVVKALEKGHEYER--LGGGANTVSS-----GYSKGDGLGAE  
RcPIP1;2 FYMVMQCLGAICGAGVVKGFEGSHDYTR--LGGGANSVNP-----GYTKGDGLGAE  
RcPIP1;3 FYMVMQCLGAICGAGVVKGFEGSHDYTR--LGGGANSVNP-----GYTKGDGLGAE  
RcPIP1;4 FYMVMQCLGAICGAGVVKGFEGDRTYET--LGGGANVVNA-----GYTKGDGLGAE  
RcPIP1;5 FYMVMQCLGAICGAGVVKGFQF-TPYER--VGGGANMVNP-----GYSKGDGLGAE  
RcPIP2;1 MYMAAQCLGAICGCGLVKAFQR-AYYN--RYGGGANELAD-----GYSTGTGLGAE  
RcPIP2;2 MYMVAQCLGAICGVGLVKAFQS-SHYK--RYGGGANTLDD-----NYSTGVGLGAE  
RcPIP2;3 GYMVAQCLGAICGCGLVKAFQK-AYYN--RYGGGANELAD-----GYNKGTGLGAE  
RcPIP2;4 AYMVAQCLGAICGVGLVKAFMK-NPYN--RLGGGANSVAS-----GYSNGTALGAE  
RcPIP2;5 SYMISQCLGAICGVGLVKAFME-HDYINITLGGGANSVAT-----GYSKGAALGAE  
RcTIP1;1 LYWIAQLLGSSTVACLLLLKFSTG-----GLTTSAFALSS-----GVGVWNAFVFE  
RcTIP1;2 LYWIAQLLGSVAVACLLLLKFSTG-----GLETSAFALSS-----GVSSWNAVVFEE  
RcTIP1;3 LYWIAQLLGSVAVACLLLLKFSTG-----GLETSAFALSS-----GVGAWNAVVFEE  
RcTIP1;4 LYWIAQLLGSSTVACLLLLKFSTH-----GMTTSAFALSS-----GVNVWNAFVFE  
RcTIP2;1 FYWIAQLLGSIVACFLLKVVVTG-----GLATPIHSVAA-----GVGAIEGVVME  
RcTIP2;2 FYWIAQCLGSIVACLLLQVFTN-----GKSIPTHGVAS-----GMSAIEGVVME  
RcTIP3;1 YYWIAQLLGAIVASLLLRVFTN-----GMRPVGFHVTS-----GVGEVGLVME  
RcTIP4;1 LYWIDQLLASSAACFLLNYLTG-----GMATPVHTLAS-----GVGVVQGI VME  
RcTIP5;1 FYWVSQLVASVMAACLLLRVAAV-----GQNLPTYIIAE-----EMTGFGASIVE  
RcNIP1;1 AYIACQVIGSTLAAGTIRLIFT----GKQDHFTGTMP-----AGSDMQSFVVE  
RcNIP2;1 YYAAAQLTGAIASFTLKVLLH----PVKHIGTTSPS-----GSDFQALVME  
RcNIP3;1 MYILAQVLGSTLASLTLRVLFN----DLDDIEVTVTQYKD-----STSDLEAIWE  
RcNIP4;1 IYIVAQVVGSLLASGTLYYIFS----VTDEAFFGTVP-----VGPMPRSFVLE  
RcNIP4;2 LYIVAQVMGSILASGTLALVVD----VNPKAYFGTVP-----VGSNWQSLIME  
RcNIP5;1 AYIAAQVSASICASFALKGVFH----PFMSGGVTVPS-----VSTGQAFALAE  
RcNIP6;1 VYIGAQVSASVCAAFALKVIFH----PFMSGGVTVPS-----GGYGQAFALAE  
RcNIP7;1 FYVVAQTVGSVTLATYAAKLVIY----IKADLMVTRPV-----QGCNSAFSVE  
CpNIP1 LYAAAQLSGATCAAFTLRLLH----PIKHLGTTTTPS-----GSDLQALVME  
OsNIP2;1 FYWAAQFTGATCASFVLKAVIH----PVDVIGTTTTPV-----GPHWHSVVE  
AtNIP6;1 VYIGAQVMASVSAAFALKAVFE----PTMSGGVTVPT-----VGLSQAFALAE  
NtAQP1 FYIVMQCLGAICGAGVVKGFQF-GPYQR--LGGGANVVNH-----GYTKGDGLGAE  
ZmPIP1;5 FYMVMQCLGAICGAGVVKGFQF-GLYMG--AGGGANAVNP-----GYTKGDGLGAE  
AtTIP1;3 LYWIAQLLGAIVAVACLLLVKSTG-----GMETAAFSLSY-----GVTPWNAVVFEE  
AtTIP1;1 LYWIAQLLGSVAVACLLILKFATG-----GLAVPAFGLSA-----GVGVVNAFVFE  
AtTIP1;2 LYWIAQLLGSVAACFLLSFATG-----GEPVPAFGLSA-----GVGSLNALVFE  
AtTIP2;1 FYWIAQLLGSVAACFLLKYVTG-----GLAVPHTSVAA-----GLGSIEGVVME  
NtTIPa LYWIDQLLASSAACFLLNYLTA-----GLETVPHTLAN-----GVSYGQGIIME  
AtTIP4;1 LYWIDQLLASSAACFLLSYLTG-----GMGTPVHTLAS-----GVSYTQGIIME  
AtTIP5;1 FYWTSQMIASVMAACLVLVKVTM-----EQHVPIYKIAG-----EMTGFGASVLE  
NtXIP1;1 $\alpha$  IYMVAQCVGAILGALALKAVVSSSTIAQTFSLGGCTITVIAPGPNGPITVGLEMAQALWLE  
NtXIP1;1 $\beta$  IYMVAQCVGAILGALALKAVVSSSTIAQTFSLGGCTITVIAPGPNGPITVGLEMAQALWLE  
StXIP1;1 $\alpha$  IYIVAQCLGAVLALRALRAVVSSSIEDTFSLGGCTVTIIAPGPNGPVTVGLETAQALWLE  
StXIP1;1 $\beta$  IYIVAQCLGAVLALRALRAVVSSSIEDTFSLGGCTVTIIAPGPNGPVTVGLETAQALWLE  
\* \* .: . \*

RcPIP1;4 IVGTFILVYTVFSATDAKRNA---RDSHVPILAPLPIGFAVFLVHLATIP I--TGTGINP  
RcPIP1;1 IVGTFVLVYTVFSATDAKRSA---RDSHVPILAPLPIGFAVFLVHLATIP I--TGTGINP  
RcPIP1;2 IVGTFVLVYTVFSATDAKRSA---RDSHVPILAPLPIGFAVFLVHLATIP I--TGTGINP  
RcPIP1;3 IVGTFVLVYTVFSATDAKRNA---RDSHVPILAPLPIGFAVFLVHLATIP I--TGTGINP  
RcPIP1;5 IVGTFVLVYTVFSATDAKRSA---RDSHVPVLAPLPIGFAVFLVHLATIP I--TGTGINP  
RcPIP2;1 IIGTFVLVYTVFAATDPKRNA---RDSHVPVLAPLPIGFAVFMVHLATIP V--TGTGINP  
RcPIP2;2 IIGTFVLVYTVFSATDPKRSA---RDSHVPVLAPLPIGFAVFMVHLATIP I--TGTGINP  
RcPIP2;3 IIGTFVLVYTVFSATDPKRSA---RDSHVPVLAPLPIGFAVFMVHLATIP I--TGTGINP  
RcPIP2;4 IIGTFVLVYTVFSATDPKRSA---RDSHVPVLAPLPIGFAVFMVHLATIP I--TGTGINP  
RcPIP2;5 IVGTFVLVYTVFSATDPKRKA---RDSHVPILAPLPIGFAVFAVHLATIP I--TGTGINP  
RcTIP1;1 IVMTFGLVYTVYATAVDPK-----KGS LGTIAPIAIGFIVGANILAGGAF--DGASMNP  
RcTIP1;2 IVMTFGLVYTVYATAVDPK-----KGNIGIIAPIAIGFIVGANILAGGAF--DGASMNP  
RcTIP1;3 IVMTFGLVYTVYATAVDPK-----KGNIGIIAPLAIGFIVGANILAGGAF--DGASMNP  
RcTIP1;4 IVMTFGLVYTVYATAIDPK-----KSEVGLIAPLAIGFVVGANILAGGAF--EGASMNP  
RcTIP2;1 IVITFALVYTVYATAADPK-----KGS LGTIAPIAIGFIVGANILAAGPF--SGGSMNP  
RcTIP2;2 IVITFALVYTVYATAADPK-----KGD LGIIAPIAIGFIVGANILAAGPF--SGGSMNP  
RcTIP3;1 MVMTFGLVYTVYATAIDPK-----RGS LGIIAPLAIGFIVGANILVGGPF--DGASMNP  
RcTIP4;1 IVLTFSLLFVYATIVDPK-----KGS IDGLGPTLTGFVVGANILAGGPF--SGASMNP  
RcTIP5;1 GVLTFGLVYTVYA-AGDPR-----RSL LGATGPLVIGLMAGANVLAAGPF--SGGSMNP  
RcNIP1;1 FIITFYLMFIISGVATDNR-----AIGELAGLAVGATVLLNVMFAGPI--SGASMNP  
RcNIP2;1 IVVTFCCMMFVTSAVATDTK-----AIGELAGIAGVSAVCITSILAGPI--SGGSMNP  
RcNIP3;1 FIITFILMFNIIAVATDYR-----AVK YLSGVAIGGTLNALLAGPI--TGASMNP  
RcNIP4;1 I IISFLLMFVISGVATDNR-----AIGELAGIAGVMTIMLNVIAGPV--SGASMNP  
RcNIP4;2 I IITFLLMFVISGVTTDDR-----TAGPLGGIGVGMTILLNVFVAGPV--SGASMNP  
RcNIP5;1 FLITFNLLFVVTAVATDTR-----AVGELAGIAGVATVMLNIIIVAGPS--SGGSMNP  
RcNIP6;1 F IISFNLMFVVTAVATDTR-----AVGELAGIAGVATVTLNIIIIAGET--TGASMNP  
RcNIP7;1 FITTFLMMFLAASLAYQAA-----TRHLSGFVIGLSIGLAVLISGPV--SGGSLNP  
CpNIP1 IVVTFSSMMFVTCVAVATDTK-----AVGELAGLAVGSAVCITSILAGPV--SGGSMNP  
OsNIP2;1 VIVTFNMMFVTLAVATDTR-----AVGELAGLAVGSAVCITSIFAGAI--SGGSMNP  
AtNIP6;1 F IISFNLMFVVTAVATDTR-----AVGELAGIAGVATVMLNIIIIAGPA--TSASMNP  
NtAQP1 IIGTFVLVYTVFSATDAKRNA---RDSYVPILAPLPIGFAVFLVHLATIP I--TGTGINP  
ZmPIP1;5 IVGTFVLVYTVFSATDAKRSA---RDSHVPILAPLPIGFAVFLVHLATIP I--TGTGINP  
AtTIP1;3 IVMTFGLVYTVYATAVDPK-----KGDIGIIAPLAIGLIVGANILVGGAF--DGASMNP  
AtTIP1;1 IVMTFGLVYTVYATAIDPK-----NGS LGTIAPIAIGFIVGANILAGGAF--SGASMNP  
AtTIP1;2 IVMTFGLVYTVYATAVDPK-----NGS LGTIAPIAIGFIVGANILAGGAF--SGASMNP  
AtTIP2;1 I IITFALVYTVYATAADPK-----KGS LGTIAPLAIGLIVGANILAAGPF--SGGSMNP  
NtTIPa VILTFSLLFVYTTIVDPK-----KGILEGMGPLLTGLVVGANIMAGGPF--SGASMNP  
AtTIP4;1 I IILTFSLLFVYATIVDPK-----KGS LDGFGPLLTGFVVGANILAGGAF--SGASMNP  
AtTIP5;1 GVLAFLVYTVFT-ASDPR-----RGLPLAVGPIFIGFVAGANVLAAGPF--SGGSMNP  
NtXIP1;1 $\alpha$  IFCTFVFLFASIW MAYDHRQAKALGLVTVLSIVGIVLGLLVFISTTVTMKKGYAGAGMNP  
NtXIP1;1 $\beta$  IFCTFVFLFASIW MAYDHRQAKALGLVTVLSIVGIVLGLLVFISTTVTMKKGYAGAGMNP  
StXIP1;1 $\alpha$  IFCTFVFLFASIW MAYDHRQAKALGHVTVLSIVGLVGLLVFISTTVTAKKGYGGAGINP  
StXIP1;1 $\beta$  IFCTFVFLFASIW MAYDHRQAKALGHVTVLSIVGLVGLLVFISTTVTAKKGYGGAGINP  
. : \* : : : \* . . : \* \*
